# Supplementary material
Source: PubMed Central journal article supplement (PMC7642291)
Supplement: mmc2.pdf [file mmc2.pdf]

# Stability of the pH-Dependent Parallel-Stranded d(CGA) Motif

Emily M. Luteran,<sup>1</sup> Jason D. Kahn,<sup>1</sup> and Paul J. Paukstelis<sup>1,\*</sup>

<sup>1</sup>Department of Chemistry and Biochemistry, University of Maryland, College Park, Maryland

**ABSTRACT** Noncanonical DNA structures that retain programmability and structural predictability are increasingly being used in DNA nanotechnology applications, in which they offer versatility beyond traditional Watson-Crick interactions. The d(CGA) triplet repeat motif is structurally dynamic and can transition between parallel-stranded homo-base paired duplex and antiparallel unimolecular hairpin in a pH-dependent manner. Here, we evaluate the thermodynamic stability and nuclease sensitivity of oligonucleotides composed of the d(CGA) motif and several structurally related sequence variants. These results show that the structural transition resulting from decreasing the pH is accompanied by both a significant energetic stabilization and decreased nuclease sensitivity as unimolecular hairpin structures are converted to parallel-stranded homo-base paired duplexes. Furthermore, the stability of the parallel-stranded duplex form can be altered by changing the 5'-nucleobase of the d(CGA) triplet and the frequency and position of the altered triplets within long stretches of d(CGA) triplets. This work offers insight into the stability and versatility of the d(CGA) triplet repeat motif and provides constraints for using this pH-adaptive structural motif for creating DNA-based nanomaterials.

**SIGNIFICANCE** This article addresses the stability of the d(CGA) triplet motif and variants in solution. Our study reveals changes in thermodynamic stability and nuclease resistance in response to pH. The identity of the 5'-nucleobase within each triplet and the position and frequency of different triplets within stretches of d(CGA) triplets can tune parallel-stranded duplex stability. This tunability can be used for nanotechnological applications in which the specificity of the 5'-nucleobase pairing interaction is used to the order of long stretches of d(CGA) triplets. These results can inform the rational design of pH-sensitive structurally switchable DNA-based nanomaterials.

## INTRODUCTION

Nucleobase pairing and stacking interactions inherent in self-complementary DNA provide the structural programmability and predictability needed to create reliable nanoscale self-assembling materials (1–5). Noncomplementary sequences have the potential to form alternative DNA structures stabilized by non-Watson-Crick base pairing and other interactions. The formation of such structures depends on local sequence and environmental factors, but the rules for stability and structure are not as established as they are for canonical duplex DNA. Predictable noncanonical structures can expand DNA's structural versatility for nanotechnology applications (6–10). Previous work on the nanotechnological applications of noncanonical DNA have focused primarily on motifs known to be biologically relevant, including

G-quadruplexes (11–13), i-motifs (14–16), and triplex-forming strands (17–19). One potential advantage of these and other noncanonical structures are their sensitivities to the local environment, including cations, salt concentration, or pH, which allow them to undergo predictable structural changes in response to environmental perturbations (20–24).

DNA oligonucleotides containing d(CGA) triplet repeats undergo pH-dependent structural switching (Fig. 1 A; (25–28)). Under acidic conditions, the d(CGA) motif forms a parallel-stranded duplex comprised completely of homo-base pairs (C-CH<sup>+</sup>, G-G, and A-A, Fig. 1 B; (26,27)). At a neutral pH, however, oligonucleotides composed of d(CGA) repeats form antiparallel interactions that are consistent with the formation of a unimolecular DNA hairpin stabilized by G-C pairs separated by potential noncanonical A-A base pairs (25–28). At a high DNA concentration and low temperature, changes in salt concentration and pH allow d(CGA)<sub>4</sub> to sample four unique conformations—parallel-stranded duplex, antiparallel hairpin,

Submitted July 2, 2020, and accepted for publication September 2, 2020.

\*Correspondence: [paukstel@umd.edu](mailto:paukstel@umd.edu)

Editor: Nadrian Seeman.

<https://doi.org/10.1016/j.bpj.2020.09.002>

© 2020 Biophysical Society.



reversibility. Self-masking quartz cuvettes with 1-cm path lengths were used for 1.4–20  $\mu\text{M}$  samples, whereas a 2-mm path length cuvette was used for 50–120  $\mu\text{M}$  samples. Final working oligonucleotide concentrations were calculated from the absorbance at 85°C.

## Melting curve data analysis

The measured absorbance values for samples at a high concentration were corrected for deviations from linearity with respect to DNA concentration. A calibration curve was obtained, and data falling above the linear range were corrected accordingly. We verified that this procedure yielded absorbance versus wavelength curves that were superimposable at all concentrations for samples that exhibited unimolecular behavior. Thermodynamic parameters for parallel-stranded duplex formation at pH 5.5 were obtained from the fit of each temperature versus absorbance melting curve to the bimolecular van't Hoff expression, as described by Petersheim and Turner (37). Similarly, the van't Hoff expression for unimolecular hairpin formation was used to fit the melt curves and extract thermodynamic parameters for data at pH 7.0 (38). The thermodynamic parameters obtained from the fits to the melting curves are reported as the average  $\pm$  SD of the results from independent fits from experiments with four to six independently prepared samples at concentrations ranging from 2 to 120  $\mu\text{M}$ .

## Circular dichroism spectroscopy

Circular dichroism (CD) spectra were obtained using a Jasco J-810 spectropolarimeter fitted with a thermostatted cell holder (Jasco, Easton, MD). Samples were prepared using 10  $\mu\text{M}$  DNA in the same buffers used for UV melting experiments: 20 mM MES, 100 mM sodium chloride (pH 5.5), 20 mM sodium cacodylate, or 100 mM sodium chloride (pH 7.0). Samples were incubated at 4°C overnight before data collection. Data were collected at room temperature at wavelengths from 220 to 320 nm.

## S1 nuclease stability assay

20  $\mu\text{M}$  DNA was incubated with 200 U/mL S1 nuclease (Thermo Fisher Scientific, Waltham, MA) in 40 mM sodium acetate (pH 4.5) or 40 mM Tris HCl (pH 7.5), 300 mM sodium chloride, and 2 mM zinc sulfate at 22°C for 2 h. The reaction was quenched with 30 mM EDTA and incubated at 70°C for 10 min. Samples were analyzed by denaturing 20% (19:1) acrylamide/bis-acrylamide and 7 M urea polyacrylamide gel electrophoresis and stained with SYBR Gold (Thermo Fisher Scientific).

## DNase I nuclease stability assay

DNA was incubated overnight at 4°C with 50 mM magnesium formate to induce structure formation, as previously described (39). The DNA was diluted to 40  $\mu\text{M}$  and was incubated with 7 U/mL DNase I (Thermo Fisher Scientific), 10 mM MES (pH 5.5) or 10 mM Tris (pH 7.5), 2.5 mM magnesium chloride, and 0.5 mM calcium chloride at 37°C for 10 min. The reaction was quenched by the addition of 5 mM EDTA and incubated at 75°C for 10 min. Samples were analyzed by 20% denaturing polyacrylamide gel electrophoresis as above and stained with SYBR Gold (Thermo Fisher Scientific).

## RESULTS AND DISCUSSION

### (CGA)<sub>6</sub> adopts parallel-stranded duplex and antiparallel hairpin forms in response to pH

Previous studies demonstrated that d(CGA)<sub>2</sub> and d(CGA)<sub>4</sub> repeat sequences could transition between antiparallel

hairpin (pH 7.0) and parallel-stranded duplex (pH 5.5) (28). To determine if this behavior is also found for (CGA)<sub>6</sub>, we analyzed the oligonucleotide and related variants by CD and UV absorbance melting (Table 1). The CD spectrum for (CGA)<sub>6</sub> at pH 5.5 showed a prominent positive band at 265 nm and a negative band at 245 nm, consistent with parallel-stranded homo-duplex formation (Fig. 2 A; 27,28)). A clear apparently two-state UV absorbance melting transition was observed for (CGA)<sub>6</sub> at pH 5.5, with a concentration-dependent melting temperature ( $T_m$ ) indicating a reaction molecularity greater than one (Fig. 2 B), consistent with the parallel bimolecular complexes seen in crystal and solution structures containing the d(CGA) motif (26–30). At pH 7.0, the measured  $T_m$  is independent of concentration, indicating a unimolecular structure, and the CD spectrum is characteristic of antiparallel strands (Fig. 2, A and B). These results are consistent with (CGA)<sub>6</sub> forming antiparallel hairpin structures at neutral pH and parallel-stranded homo-duplexes under acidic conditions.

### Parallel-stranded duplexes are more stable than antiparallel hairpins

(CGA)<sub>6</sub> was analyzed by UV melting to establish thermodynamic parameters for the conformations observed at each pH (Table 2). Thermodynamic parameters for the parallel duplex or hairpin formation were extracted from UV melting curves fit to two-state bimolecular or unimolecular models, respectively. For each data set, the entire absorbance versus temperature curve was fit with the van't Hoff equation assuming constant enthalpy ( $\Delta H^\circ$ ) and entropy ( $\Delta S^\circ$ ), as described in Materials and Methods. Although (CGA)<sub>6</sub> exhibited apparent two-state melting profiles at both pH 5.5 and 7.0 and had similar  $T_m$ s in this concentration range, detailed examination of the pH 7.0 melting curves (Fig. 2 B) shows that there are significant underlying differences in the stabilities of the two structures. The higher baseline slope of the antiparallel form at pH 7.0 suggests that its structure may be changing as a function of temperature even at low temperature. The decrease in the slope at

**TABLE 1 Sequences of DNA Oligonucleotides**

| DNA Name               | Sequence (5' → 3')             |
|------------------------|--------------------------------|
| (CGA) <sub>7</sub>     | d(CGACGACGACGACGACGACGA)       |
| (CGA) <sub>6</sub>     | d(CGACGACGACGACGACGA)          |
| (CGA) <sub>5</sub>     | d(CGACGACGACGACGA)             |
| (CGA) <sub>4</sub>     | d(CGACGACGACGA)                |
| TGA(CGA) <sub>5</sub>  | d( <u>T</u> GACGACGACGACGACGA) |
| (CGA) <sub>5</sub> TGA | d(CGACGACGACGACGATGA)          |
| (CGATGA) <sub>3</sub>  | d(CGATGACGATGACGATGA)          |
| (TGA) <sub>6</sub>     | d(TGATGATGATGATGATGA)          |
| GGA(CGA) <sub>5</sub>  | d(GGACGACGACGACGACGA)          |
| (GAC) <sub>6</sub>     | d( <u>G</u> ACGACGACGACGACGAC) |

Underlined nucleotides differ from the (CGA)<sub>n</sub> pattern.

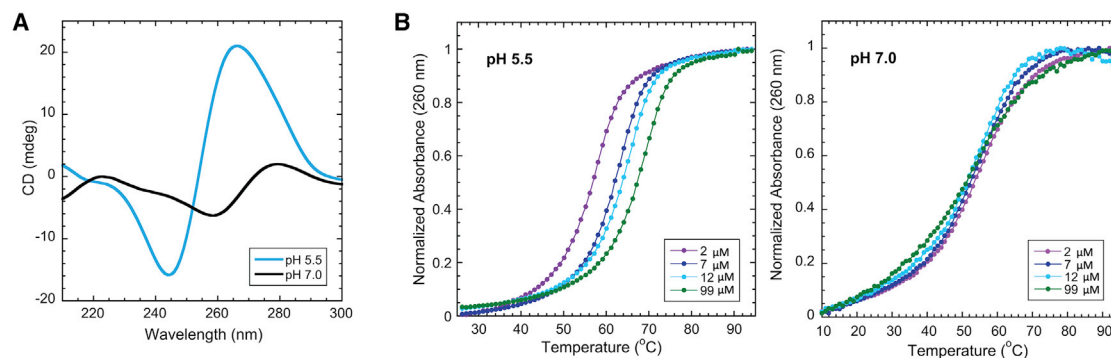

FIGURE 2 (CGA)<sub>6</sub> adopts a parallel-stranded duplex or an antiparallel hairpin in response to pH. (A) Shown are CD spectra of 10 μM (CGA)<sub>6</sub> at pH 5.5 and pH 7.0. At pH 5.5, the prominent positive band at 265 nm and negative band at 245 nm are consistent with parallel-stranded duplex formation. At pH 7.0, the positive band at 275 nm and negative band at 258 nm are characteristic of antiparallel strands (27). (B) Normalized temperature versus absorbance curves for (CGA)<sub>6</sub> show concentration-dependent T<sub>m</sub> at pH 5.5 and concentration-independent T<sub>m</sub> at pH 7.0, suggesting bi-/multimolecular and largely unimolecular structure formation, respectively. To see this figure in color, go online.

T<sub>m</sub> as the concentration increases (i.e., an apparent decrease in  $\Delta H^\circ$  and  $\Delta S^\circ$ ) suggests some bimolecular or multimolecular behavior. Comparing the thermodynamic parameters of (CGA)<sub>6</sub> determined at pH 5.5 and at 7.0, the standard state formation free energy ( $\Delta G^\circ_{37}$ ) and  $\Delta H^\circ$  were destabilized by 12.2 and 58.6 kcal/mol, respectively; the similar T<sub>m</sub>s arise from the difference between unimolecular interaction at very high effective local concentration versus bimolecular interactions at concentrations much less than the standard state 1 M. This suggests that the parallel-stranded duplex form containing intermolecular GA stacking and hydrogen bonding interactions provides substantial structural stabilization versus the antiparallel hairpin.

### (CGA)<sub>6</sub> variants exhibit structural switching in response to pH

We designed several sequence variants to investigate how the triplet identity and position in hexa-repeats impact structural switching and stability (Table 1). (CGA)<sub>6</sub>, TGA(CGA)<sub>5</sub>, and GGA(CGA)<sub>5</sub> were synthesized to probe the significance of the 5' most capping nucleotides in parallel duplexes. Furthermore, sequences (CGA)<sub>5</sub>TGA, (CGATGA)<sub>3</sub>, and (TGA)<sub>6</sub> were designed to test the positional and frequency compatibility of d(CGA) and d(TGA) triplets. Finally, (GAC)<sub>6</sub> allowed a direct comparison with (CGA)<sub>6</sub> to examine how a subtle terminal sequence

TABLE 2 Thermodynamic Parameters for (CGA)<sub>6</sub> and Variants at pH 5.5 and 7.0

| Thermodynamic Parameters, pH 5.5 <sup>a</sup> |                                  |                                  |                             |                              |                                                     |
|-----------------------------------------------|----------------------------------|----------------------------------|-----------------------------|------------------------------|-----------------------------------------------------|
| Sequence                                      | T <sub>m</sub> (°C) <sup>b</sup> | $\Delta G^\circ_{37}$ (kcal/mol) | $\Delta H^\circ$ (kcal/mol) | $\Delta S^\circ$ (cal/mol K) | $\Delta\Delta G^\circ_{37}$ (kcal/mol) <sup>c</sup> |
| (CGA) <sub>7</sub>                            | 61                               | -15.6 ± 0.9                      | -107.9 ± 7.2                | -298 ± 21                    | -3.8 ± 1.0                                          |
| (CGA) <sub>6</sub>                            | 60                               | -14.2 ± 0.7                      | -92.1 ± 3.1                 | -251 ± 9                     | -2.4 ± 0.8                                          |
| (CGA) <sub>5</sub>                            | 54                               | -11.8 ± 0.4                      | -75.8 ± 1.4                 | -207 ± 4                     | 0                                                   |
| (CGA) <sub>4</sub>                            | 43                               | -8.9 ± 0.2                       | -60.9 ± 3.5                 | -168 ± 11                    | 2.9 ± 0.4                                           |
| TGA(CGA) <sub>5</sub>                         | 58                               | -13.4 ± 0.5                      | -85.6 ± 2.4                 | -233 ± 7                     | -1.6 ± 0.7                                          |
| (CGA) <sub>5</sub> TGA                        | 49                               | -10.3 ± 0.3                      | -65.8 ± 2.2                 | -179 ± 7                     | 1.4 ± 0.5                                           |
| (CGATGA) <sub>3</sub>                         | 32                               | -6.9 ± 0.3                       | -59.7 ± 3.2                 | -171 ± 10                    | 4.9 ± 0.5                                           |
| (TGA) <sub>6</sub>                            | NA                               | NA                               | NA                          | NA                           | NA                                                  |
| GGA(CGA) <sub>5</sub>                         | 56                               | -13.2 ± 0.7                      | -91.2 ± 2.6                 | -252 ± 8                     | -1.4 ± 0.8                                          |
| (GAC) <sub>6</sub>                            | 58                               | -13.3 ± 0.4                      | -85.8 ± 2.3                 | -234 ± 7                     | -1.5 ± 0.6                                          |
| Thermodynamic Parameters, pH 7.0 <sup>d</sup> |                                  |                                  |                             |                              |                                                     |
| Sequence                                      | T <sub>m</sub> (°C) <sup>b</sup> | $\Delta G^\circ_{37}$ (kcal/mol) | $\Delta H^\circ$ (kcal/mol) | $\Delta S^\circ$ (cal/mol K) | $\Delta\Delta G^\circ_{37}$ (kcal/mol)              |
| (CGA) <sub>6</sub>                            | 55                               | -2.0 ± 0.2                       | -33.5 ± 1.1                 | -102 ± 3                     | 9.8 ± 0.4                                           |

NA, not applicable.

<sup>a</sup>Thermodynamic parameters obtained at pH 5.5 are reported as averages of van't Hoff analysis curve fitting results assuming bimolecular duplex formation, with oligomer concentrations between 1 and 120 × 10<sup>-6</sup> M. Errors in  $\Delta H^\circ$  and  $\Delta S^\circ$  are reported as one SD from at least four concentrations, and error in  $\delta G^\circ_{37}$  is propagated as previously described (40–42).

<sup>b</sup>T<sub>m</sub> values are calculated for oligomer concentration of 3 × 10<sup>-6</sup> M.

<sup>c</sup> $\Delta\Delta G^\circ_{37}$  for each sequence calculated with respect to (CGA)<sub>5</sub>. Negative values represent a stabilized free energy of formation, whereas positive values represent destabilized free energy of formation.

<sup>d</sup>Thermodynamic parameters and T<sub>m</sub> for pH 7.0 are reported as the average of four van't Hoff curve fit data sets, assuming unimolecular hairpin formations, with oligomer concentrations between 1 and 10 × 10<sup>-6</sup> M.



permutation impacts thermodynamic stability. CD analysis was used to examine the structural transitions of the variant sequences in response to pH. All variants except (TGA)<sub>6</sub> and (CGATGA)<sub>3</sub> had CD spectra consistent with the pH-dependent structures seen in (CGA)<sub>6</sub> (Fig. S1). Interestingly, CD spectra for (TGA)<sub>6</sub> had characteristics of antiparallel strands at both pH 5.5 and 7.0, whereas the spectra for (CGATGA)<sub>3</sub> could represent an equilibrium between both forms. This suggests a decreased pH sensitivity and a preference for antiparallel strands with increasing d(TGA) triplet content. All variants except (TGA)<sub>6</sub> had concentration-dependent, two-state melting curves at pH 5.5, indicating bimolecular interactions (Fig. S2). Interestingly, (CGA)<sub>6</sub> was the only oligomer that exhibited clear two-state melting at pH 7.0, with all of the other sequence variants having an apparent minor lower-temperature melting transition between 20 and 40°C. The multistate transitions at pH 7.0 may reflect populations of hairpin and antiparallel duplex structures (25).

### Antiparallel homogeneity correlates with d(CGA) repeat length

At pH 7.0, there are interesting differences in the melting profiles for (CGA)<sub>n</sub> (n = 4–7) (Figs. S3 and S4). When n = 4 or 5, the melting profile is broad with multiple transitions, whereas when n ≥ 6, the melting transition is still broad but becomes more two state. The multitransition melting profile seen in shorter (CGA)<sub>n</sub> repeats (n ≤ 5) suggests that a temperature-dependent equilibrium between hairpin and duplex or higher-order forms may exist. In contrast, the two-state profile for longer repeat sequences (n ≥ 6) suggests they exist predominantly in the hairpin conformation. This trend is similar to the length-dependent conformational equilibrium seen in other triplet repeats (25) and further supports the importance of oligo lengths in rational structure design.

### Estimated $\Delta G^{\circ}_{37}$ values can be used to predict the energetics of new triplet repeat sequences

To estimate the energetic contribution of each parallel-stranded triplet unit, we compared thermodynamic parameters of oligonucleotides with a differing number of repeat units. Strong apparent enthalpy-entropy compensation is observed for the set of (CGA)<sub>n</sub> variants tested (Fig. S5). The positive correlation seen in the  $\Delta H^{\circ}$  versus  $\Delta S^{\circ}$  plot demonstrates the strong enthalpy-entropy compensation, whereas the  $\Delta G^{\circ}_{37}$  versus  $\Delta H^{\circ}$  plot confirms that the apparent compensation is not an artifact of experimental error. As a simple predictor of the  $\Delta G^{\circ}_{37}$  for (CGA)<sub>n</sub> sequences, the number of d(CGA) units were plotted against the respective experimental  $\Delta G^{\circ}_{37}$  value (Fig. S6). Interestingly, the y-intercept (−0.250 kcal/mol) of the linear fit, which corresponds to the  $\Delta G^{\circ}_{37}$  for a n = 1 sequence, could

represent the gain in stability upon formation of the first triplet unit slightly overbalancing the entropic penalty of bringing the strands together. The linear relationship can be used to predict the  $\Delta G^{\circ}_{37}$  for a (CGA)<sub>n</sub> triplet of any length and can be combined with other estimates (5′-d(GGA), 5′-d(TGA), 3′-d(TGA), see below) to predict  $\Delta G^{\circ}_{37}$  of various sequences (Fig. S6). Importantly, these results are internally consistent and provide a baseline for understanding the energetic contributions of these triplets.

### The 5′-nucleotide influences parallel duplex stability

We compared  $\Delta G^{\circ}_{37}$  for variants with different 5′-terminal capping triplets for which structural information was available (d(CGA), d(GGA), or d(TGA)) to (CGA)<sub>5</sub> to understand how the identity of the 5′ triplet contributed to thermodynamic stability of the parallel-stranded duplex. The 5′-d(GGA) triplet ( $\Delta\Delta G^{\circ}_{37} = -1.4$  kcal/mol with respect to (CGA)<sub>5</sub>) and the 5′-d(TGA) triplet (−1.6 kcal/mol with respect to (CGA)<sub>5</sub>) show similar contributions, both being less stabilizing than the 5′-d(CGA) triplet, estimated above at −2.4 kcal/mol. If the 5′ triplet contains the anticipated GA interstrand stacking interactions, the differences in  $\Delta G^{\circ}_{37}$  between d(CGA), d(GGA), and d(TGA) triplets can be attributed primarily to the terminal 5′-nucleotide identity. Though the 5′-d(GGA) triplet appears compatible with 5′-d(CGA) in the parallel-stranded duplex, incurring only a slight thermodynamic destabilization, our preliminary modeling suggests that stretches of internal d(GGA) triplets would not be well accommodated because of structural clashes that would arise from an internal G<sub>syn</sub> residue (34,36). CD data further suggest that stretches of d(GGA) triplets do not form the expected structure at either pH (Fig. S7). The small change between the terminal d(GGA) and d(TGA) suggests that the 5′-G and 5′-T are thermodynamically comparable in the parallel duplex. Interestingly, the entropy of formation for GGA(CGA)<sub>5</sub> and (CGA)<sub>6</sub> is considerably lower than for TGA(CGA)<sub>5</sub>, which could result from conformational variability introduced by a G residue in the *syn* conformation, as seen in crystal structures containing the parallel-stranded d(GGA) motif. The destabilization caused by the 5′-T can also be attributed to enthalpic destabilization (−92.1 to −85.6 kcal/mol), reflecting the loss of one hydrogen bond by replacing the hemiprotonated C-CH<sup>+</sup> with T-T base pair. Additional electronic effects from the cationic C-CH<sup>+</sup> base pair that are not found in the T-T or G-G base pairs may also contribute.

Notably, the  $\Delta G^{\circ}_{37}$  for (GAC)<sub>6</sub> (−13.3 kcal/mol) is different than (CGA)<sub>6</sub> (−14.2 kcal/mol), though d(GAC) is a simple permutation of d(CGA). The structural basis for this difference is not immediately clear, but it does suggest that the identity of the terminal homo-base pairs—5′ or 3′—can influence parallel-stranded duplex stability. The variation in thermodynamic stability suggests that the

strength of interactions at the 5'-terminus could play an important role in parallel-stranded duplex nucleation and stabilization. Nucleotides providing strong intermolecular interactions could help to lock the duplex in place to avoid premature end fraying, contributing to enhanced overall thermodynamic stability. Further studies will show whether the apparent non-nearest neighbor effects in d(GAC) versus d(CGA) act at the triplet level or the oligonucleotide terminus level.

### d(TGA) triplet position and frequency impacts the thermodynamic stability of mixed (YGA)<sub>6</sub> oligomers

The identity of the 5'-pyrimidine in the d(CGA) triplet motif leads to subtle but significant structural changes in the parallel-stranded duplex, evident in crystal structures containing d(CGA) and d(TGA) repeats (30,31). C-CH<sup>+</sup> base pairs induce an asymmetry, likely as a result of a hydrogen bond between N4 of one cytosine to the nonbridging phosphate oxygen of the previous intrachain adenosine (30). In contrast, the T-T base pair retains duplex symmetry at the expense of stacking interactions. Our results show that the frequency of d(TGA) triplets within (YGA)<sub>6</sub> oligomers has a significant impact on the thermodynamic stability of the parallel-stranded duplex.

At pH 5.5, (CGA)<sub>6</sub> has a clear two-state melting transition, indicating structure formation when the sequence is completely comprised of d(CGA) triplets (Fig. 3). In contrast, (TGA)<sub>6</sub> had no evident melting transition at pH 5.5 or 7.0 (Fig. 3), suggesting that the d(TGA) triplet is unable to adopt a stable structure at either pH. This could indicate that the interactions formed by the T-T base pair are either not strong enough to nucleate structure formation or are transient.

We tested the destabilizing effects associated with position and number of d(TGA) triplets in a given (YGA)<sub>6</sub> sequence using the sequence variants TGA(CGA)<sub>5</sub>, (CGA)<sub>5</sub>TGA, (CGATGA)<sub>3</sub>, and (TGA)<sub>6</sub>. As described above, in the parallel duplex form, the addition of a d(TGA) triplet to the 5'-end stabilized the free energy of formation by  $-1.6 \pm 0.7$  kcal/mol compared with (CGA)<sub>5</sub> (Table 1). (CGA)<sub>5</sub>TGA was tested to observe the impact of the d(TGA) triplet at the 3'-end. This resulted in a destabilization of the free energy of duplex formation by  $1.4 \pm 0.7$  kcal/mol compared with (CGA)<sub>5</sub>, suggesting that the position of the d(TGA) triplet significantly impacts the thermodynamic stability of the parallel-stranded duplex. When the d(TGA) is at the 5'-end, the T-T homo-base pair interaction induces a slight thermodynamic destabilization, compared to a 5'-C-CH<sup>+</sup> homo-base pair. In contrast, when the T-T homo-base pair is positioned internally within the 3' triplet, there is a significantly greater impact on duplex stability, presumably through disruption of the downstream G-G and A-A base pairs. Correspondingly, more substantial destabilization (7.5 kcal/mol) was

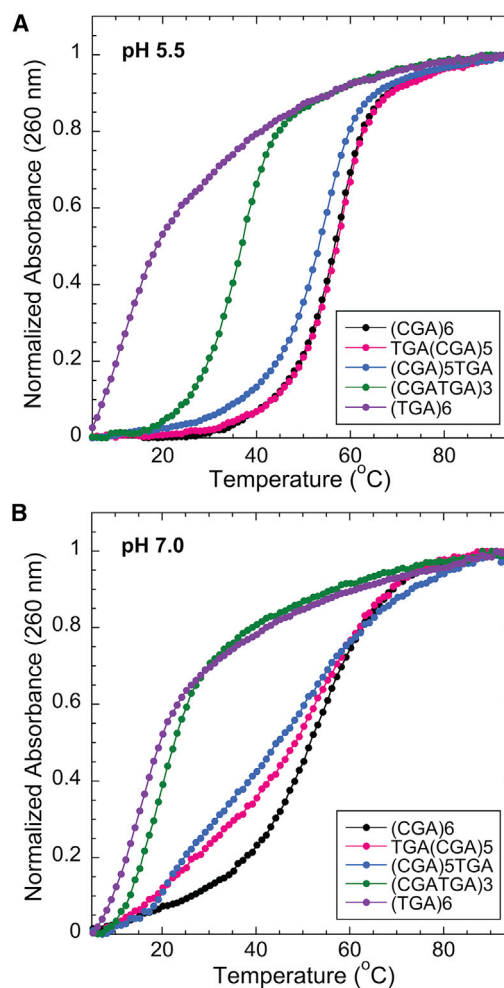

FIGURE 3 The addition of d(TGA) triplets decreases the  $T_m$  of (YGA)<sub>6</sub> oligomers. Shown is normalized temperature versus absorbance curves for (YGA)<sub>6</sub> oligomers with d(TGA) triplets ( $n = 6, 3, 1,$  and  $0$ ). (A) At pH 5.5, all variants except (TGA)<sub>6</sub> exhibit two-state melting. (B) At pH 7.0, (CGA)<sub>6</sub> is the only variant to retain two-state melting. (CGA)<sub>5</sub>TGA and TGA(CGA)<sub>5</sub> have broad melting curves with multiple transitions, whereas (TGA)<sub>6</sub> and (CGATGA)<sub>3</sub> do not have clear melting transitions, suggesting a lack of stable structure formation. To see this figure in color, go online.

observed when multiple d(TGA) triplets were added as in (CGATGA)<sub>3</sub>.

Although the d(TGA) triplets decrease thermodynamic stability, they have the potential to modulate pH sensitivity. CD results for (TGA)<sub>6</sub> (Fig. S1) suggest that the presence of multiple d(TGA) triplets correspond to decreased pH sensitivity and preference for the antiparallel form. d(TGA) triplets can be combined with other strong parallel-strand inducing triplets, such as d(GGA) or d(CGA), potentially providing a unique system for tuning structure formation over specific pH ranges. Information on the thermodynamic stability of sequences containing tandem d(YGA) triplets can be combined with structural data to provide valuable insight in optimizing parallel-stranded duplexes for 3D DNA crystal design and nanoscale applications.

## Parallel-stranded duplexes resist nuclease digestion

With increasing interest in using DNA nanotechnology in cellular applications, we assessed the stability of DNA structures in conditions that mimic cellular environments. To gain insight on the behavior of the d(YGA) triplet motif in cellular conditions, we qualitatively examined resistance to nucleases with preferences for double-stranded B-DNA (DNase I) or unpaired, single-stranded DNA (S1 nuclease). CD data suggest that these structures are maintained at various cation concentrations or with the addition of divalent cations present in the nuclease buffers (Fig. S8). Control experiments confirmed the activity of both enzymes for different substrates at the pHs tested; DNase I functioned optimally on double-stranded substrates at low pH, whereas S1 nuclease showed decreased activity at pH 7.5 for its single-stranded substrate (Fig. S9).

Each variant tested was incubated with DNase I at pH 5.5 and 7.5 (Fig. 4 A). At pH 7.5, (CGA)<sub>6</sub>, TGA(CGA)<sub>5</sub>, and (CGA)<sub>5</sub>TGA show clear cleavage patterns, suggesting that the structure formed at pH 7.5 has DNase I-recognizable regions. This supports previous analysis indicating the formation of an antiparallel hairpin at near-neutral pH. Importantly,

these same variants showed clear DNase I resistance when the reaction was repeated at pH 5.5. This suggests that the parallel-stranded duplex formed by (CGA)<sub>6</sub>, TGA(CGA)<sub>5</sub>, (CGA)<sub>5</sub>TGA, and (CGATGA)<sub>3</sub> is not recognized by DNase I. (CGATGA)<sub>3</sub> appears to have slight protection at the lower pH, whereas the cleavage of (TGA)<sub>6</sub> is identical at both pHs. Overall, these results are consistent with our UV melting observations showing no stable structure formation for either of these last two oligos at pH 7.0 and some weakly forming structure for (CGATGA)<sub>3</sub> at the lower pH.

A similar experiment was performed to test d(YGA) repeat susceptibility to the single strand-specific S1 nuclease. (CGA)<sub>6</sub>, TGA(CGA)<sub>5</sub>, (CGA)<sub>5</sub>TGA, and (CGATGA)<sub>3</sub> S1 nuclease cleavage products at pH 7.5 suggest that single-stranded regions are primarily associated with hairpin ends (Fig. 4 B). Intense bands visible at ≥14 nucleotides (nt) are consistent with the degradation of terminal nonbase paired nucleotides and/or single-stranded triplet overhangs at the hairpin terminus. The difference in degradation pattern between all variants suggests that the hairpins formed are not structurally identical. All oligonucleotides were fully digested at pH 7.5 when exposed to S1 nuclease for 2 days, suggesting that the antiparallel hairpin is

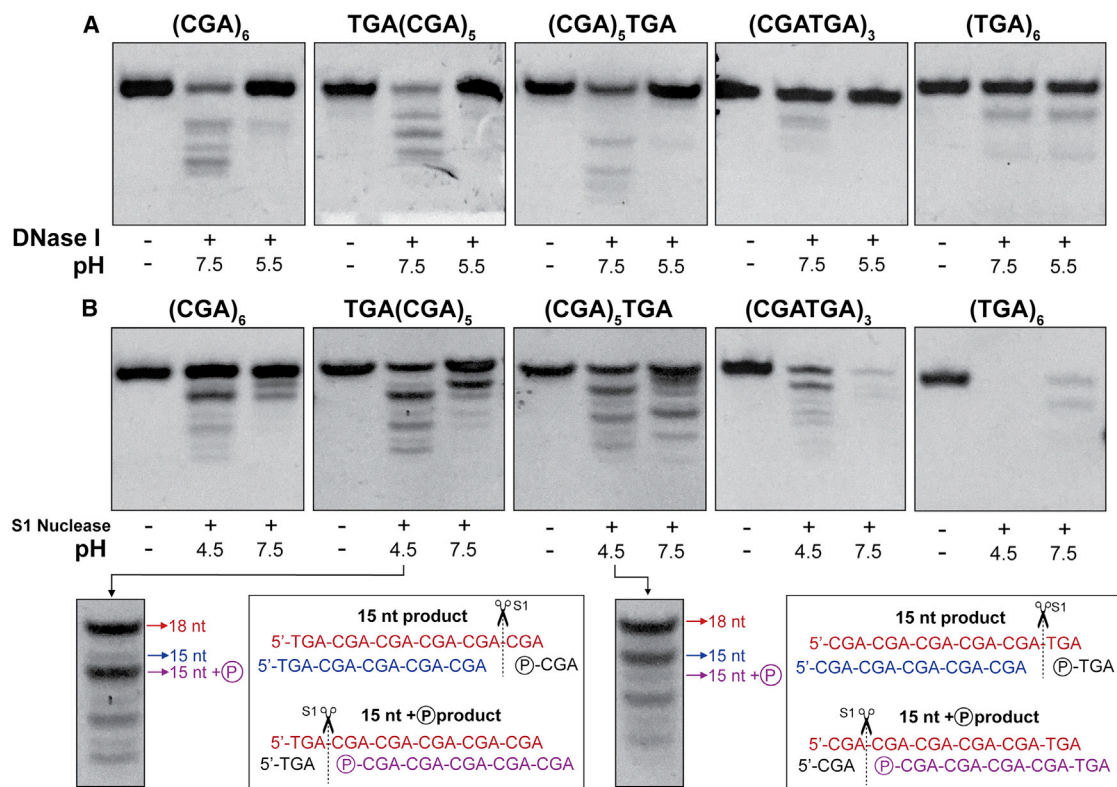

FIGURE 4 Parallel-stranded duplex enhances nuclease resistance. (A) (YGA)<sub>6</sub> variants digested with DNase I at pH 7.5 or 5.5. DNase I preferentially cuts double-stranded DNA, suggesting that the parallel duplexes formed at pH 5.5 are resistant to DNase I degradation. (B) Shown are (YGA)<sub>6</sub> variants digested with S1 nuclease at pH 7.5 or 4.5. Red labeled sequences correspond to full length DNA (18-nt), without any nuclease modification. Blue sequences represent the nuclease cleavage product without a terminal phosphate group. The magenta sequence corresponds to the nuclease cleavage product containing a terminal phosphate group, leading to increased mobility. To see this figure in color, go online.



dynamic enough to be susceptible to S1 digestion over extended time periods (Fig. S10).

(CGA)<sub>6</sub>, TGA(CGA)<sub>5</sub>, (CGA)<sub>5</sub>TGA, and (CGATGA)<sub>3</sub> were only partially digested by S1 nuclease at its optimal pH of 4.5 (Fig. 4 B). UV melting and CD experiments indicate that these oligonucleotides form parallel-stranded duplexes in conditions similar to S1 nuclease reaction conditions, explaining the lack of complete S1 digestion. The intense 15-nt band present in the degradation of (CGA)<sub>6</sub> suggests that a small population of the parallel-stranded duplexes are frame-shifted by one d(CGA) triplet, creating 3-nt S1 nuclease-accessible single-stranded overhangs. The intense unreacted band remaining at 18-nt suggests that most oligomers in the reaction populated the perfectly aligned parallel-stranded duplex, which resisted S1 nuclease digestion. The low molecular weight degradation products could result from frame-shifted duplexes containing more than one triplet overhang. Apparently, once duplexes are formed, frame-shifting is extremely slow at room temperature, or else equilibration among frames would have exposed all of the sequence to S1 activity.

TGA(CGA)<sub>5</sub> and (CGA)<sub>5</sub>TGA show S1 degradation patterns similar to each other, consistent with triplet cleavage, as intense bands persist at 15, 12, and 9 nt. Interestingly, each intense band is coupled with a faint band, where the position and intensity can be used to gain insight into the S1 cleavage site. The cleavage of a 5'-triplet will produce a fast migrating 15-nt product containing a terminal phosphate, whereas the cleavage of a 3'-triplet will produce a slower migrating 15-nt product that does not have a 5'-phosphate. The faster migrating 15-nt band is very intense in TGA(CGA)<sub>5</sub>, suggesting that the 5'-d(TGA) triplet was preferentially digested. The opposite is seen in (CGA)<sub>5</sub>TGA, in which the intense 15-nt band migrates slower, suggesting that the 3'-d(TGA) was cleaved (Fig. 4 B). The bands at 18, 15, and 12-nt persist when exposed to S1 nuclease for up to 2 days, indicating that the parallel-stranded duplex is stable at room temperature (Fig. S10). (TGA)<sub>6</sub> was almost completely digested by S1 nuclease by the end of the reaction time, indicating the lack of structure formation at each pH (Fig. 4 B). This further confirms results from CD and UV melting experi-

ments that suggest that (TGA)<sub>6</sub> does not form stable structures at acidic or neutral pH.

### Stable high molecular weight structures form in all cytosine-containing variants

Unexpected high molecular weight (HMW) products form over time for (CGA)<sub>6</sub> and all variants, except (TGA)<sub>6</sub>, and persist in 8 M urea denaturing gels (Fig. S11). We found the HMW products present over the pH range used in this study after incubation at room temperature. Preliminary experiments (data not shown) suggested that these HMW structures appear more quickly at lower pHs, higher temperature, and higher oligonucleotide concentration. The formation of the stable HMW structures likely rely on cytosine reactivity as HMW bands were never observed for (TGA)<sub>6</sub> or (TGA)<sub>5</sub>. We cannot confirm the identity or mechanism of HMW band formation, but we suspect that stable aggregates or cross-links are formed from reactions with depurination products of the d(CGA) triplet repeats over time.

### CONCLUSIONS

This work uses a systematic approach to determine the stability of the d(CGA) triplet repeat motif and variants in solution. It is evident that (CGA)<sub>6</sub> and variants undergo pH-induced structural switching that coincides with a thermodynamic destabilization. This trend can be linked to the loss of strong interstrand GA base stacking and homobase pair interactions as pH is increased. Previous studies have investigated the formation of the parallel-stranded duplex of short (CGA)<sub>n</sub> repeats ( $n \leq 4$ ) in solution (28) or within a complex crystal structure (30,32). Additional structural studies on sequences containing (CGA)<sub>n</sub> triplets ( $n > 4$ ) will be useful in providing in-depth insight into the behavior of long stretches of tandem d(CGA) repeats to further confirm the specific interactions responsible for the difference in thermodynamic stability at pH 5.5 and 7.0. It is clear that the addition of d(TGA) repeats decreases thermodynamic stability, but structure is not completely destroyed if d(TGA) units are in tandem with strong parallel strand-inducing triplets. (CGA)<sub>6</sub> and related variants have been proposed to be useful in designing new parallel-

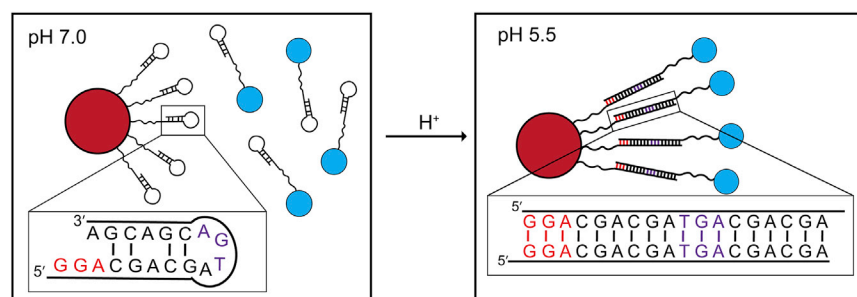

FIGURE 5 Potential use of (CGA)<sub>6</sub> and variants in DNA nanotechnology applications in which pH changes could localize particles together. At pH 7.0, d(CGA) forms hairpin structures, preventing duplex formation, and particles remain separate. At pH 5.5, parallel-stranded duplexes can form and localize particles of interest together. d(TGA) and d(GGA) triplets can be used to ensure desired registration and length of the linking duplex. Linker stretches solely comprised of d(CGA) triplets could be used, but distance between particles of interest could vary. To see this figure in color, go online.



stranded DNA architectures. Specifically, particles decorated with oligonucleotides containing  $d(\text{CGA})_n$  triplets could be localized or separated based on structural changes caused by pH (Fig. 5). Considering slight structural and thermodynamic deviations between each terminal 5'-residue, this motif could also serve as a discriminator in programmable pairing of long stretches of  $d(\text{YGA})$  triplets. Additionally, the parallel-stranded duplex formed in acidic pH offers increased nuclease resistance, furthering the potential for this material to be used in cellular applications. The solution stability data presented in this work can be used to strategically design and optimize sequences for use in the rational design of 3D DNA crystals or nanotechnology applications that could benefit from pH-triggered structural switching.

## SUPPORTING MATERIAL

Supporting Material can be found online at <https://doi.org/10.1016/j.bpj.2020.09.002>.

## AUTHOR CONTRIBUTIONS

E.M.L. designed and performed experiments, analyzed the data, and wrote the manuscript. J.D.K. contributed to data analysis, discussion, and writing. P.J.P. designed experiments, contributed to data analysis and discussion, and wrote the manuscript.

## REFERENCES

- Seeman, N. C. 1982. Nucleic acid junctions and lattices. *J. Theor. Biol.* 99:237–247.
- Rothmund, P. W. K. 2006. Folding DNA to create nanoscale shapes and patterns. *Nature*. 440:297–302.
- Jones, M. R., N. C. Seeman, and C. A. Mirkin. 2015. Nanomaterials. Programmable materials and the nature of the DNA bond. *Science*. 347:1260901.
- Seeman, N. C. 2010. Nanomaterials based on DNA. *Annu. Rev. Biochem.* 79:65–87.
- Wu, D., L. Wang, ..., W. Jiang. 2017. DNA nanostructure-based drug delivery nanosystems in cancer therapy. *Int. J. Pharm.* 533:169–178.
- Rich, A. 1993. DNA comes in many forms. *Gene*. 135:99–109.
- Bhatia, D., S. Sharma, and Y. Krishnan. 2011. Synthetic, bifunctional nucleic acid-based molecular devices. *Curr. Opin. Biotechnol.* 22:475–484.
- Szabat, M., and R. Kierzek. 2017. Parallel-stranded DNA and RNA duplexes - structural features and potential applications. *FEBS J.* 284:3986–3998.
- Mergny, J. L., and D. Sen. 2019. DNA quadruple helices in nanotechnology. *Chem. Rev.* 119:6290–6325.
- Dong, Y., Z. Yang, and D. Liu. 2014. DNA nanotechnology based on i-motif structures. *Acc. Chem. Res.* 47:1853–1860.
- Sha, R., L. Xiang, ..., N. C. Seeman. 2018. Charge splitters and charge transport junctions based on guanine quadruplexes. *Nat. Nanotechnol.* 13:316–321.
- Kotlyar, A. B., N. Borovok, ..., D. Porath. 2005. Long, monomolecular guanine-based nanowires. *Adv. Mater.* 17:1901–1905.
- Li, Z., and C. A. Mirkin. 2005. G-quartet-induced nanoparticle assembly. *J. Am. Chem. Soc.* 127:11568–11569.
- Nesterova, I. V., and E. E. Nesterov. 2014. Rational design of highly responsive pH sensors based on DNA i-motif. *J. Am. Chem. Soc.* 136:8843–8846.
- Song, L., V. H. Ho, ..., D. Zhou. 2013. Efficient, pH-triggered drug delivery using a pH-responsive DNA-conjugated gold nanoparticle. *Adv. Healthc. Mater.* 2:275–280.
- Keum, J. W., and H. Bermudez. 2012. DNA-based delivery vehicles: pH-controlled disassembly and cargo release. *Chem. Commun. (Camb.)*. 48:12118–12120.
- Chandrasekaran, A. R., and D. A. Rusling. 2018. Triplex-forming oligonucleotides: a third strand for DNA nanotechnology. *Nucleic Acids Res.* 46:1021–1037.
- Liao, W. C., M. Riutin, ..., I. Willner. 2016. Programmed pH-responsive microcapsules for the controlled release of CdSe/ZnS quantum dots. *ACS Nano*. 10:8683–8689.
- Chen, Y., and C. Mao. 2004. Reprogramming DNA-directed reactions on the basis of a DNA conformational change. *J. Am. Chem. Soc.* 126:13240–13241.
- Largy, E., A. Marchand, ..., J. L. Mergny. 2016. Quadruplex turncoats: cation-dependent folding and stability of quadruplex-DNA double switches. *J. Am. Chem. Soc.* 138:2780–2792.
- Engelhard, D. M., J. Nowack, and G. H. Clever. 2017. Copper-induced topology switching and thrombin inhibition with telomeric DNA G-quadruplexes. *Angew. Chem. Int.Engl.* 56:11640–11644.
- Liu, D., and S. Balasubramanian. 2003. A proton-fuelled DNA nanomachine. *Angew. Chem. Int.Engl.* 42:5734–5736.
- Muser, S. E., and P. J. Paukstelis. 2012. Three-dimensional DNA crystals with pH-responsive noncanonical junctions. *J. Am. Chem. Soc.* 134:12557–12564.
- Modi, S., C. Nizak, ..., Y. Krishnan. 2013. Two DNA nanomachines map pH changes along intersecting endocytic pathways inside the same cell. *Nat. Nanotechnol.* 8:459–467.
- Zheng, M., X. Huang, ..., X. Gao. 1996. Genetically unstable CXG repeats are structurally dynamic and have a high propensity for folding. An NMR and UV spectroscopic study. *J. Mol. Biol.* 264:323–336.
- Robinson, H., G. A. van der Marel, ..., A. H. Wang. 1992. Unusual DNA conformation at low pH revealed by NMR: parallel-stranded DNA duplex with homo base pairs. *Biochemistry*. 31:10510–10517.
- Robinson, H., and A. H. Wang. 1993. 5'-CGA sequence is a strong motif for homo base-paired parallel-stranded DNA duplex as revealed by NMR analysis. *Proc. Natl. Acad. Sci. USA*. 90:5224–5228.
- Kejnovská, I., M. Tůmová, and M. Vorlíčková. 2001.  $(\text{CGA})_4$ : parallel, anti-parallel, right-handed and left-handed homoduplexes of a trinucleotide repeat DNA. *Biochim. Biophys. Acta*. 1527:73–80.
- Sunami, T., J. Kondo, ..., A. Takénaka. 2002. Crystal structure of  $d(\text{GCGAAAGCT})$  containing a parallel-stranded duplex with homo base pairs and an anti-parallel duplex with Watson-Crick base pairs. *Nucleic Acids Res.* 30:5253–5260.
- Tripathi, S., and P. J. Paukstelis. 2016. Structural implications of homopyrimidine base pairs in the parallel-stranded  $d(\text{YGA})$  motif. *ChemBioChem*. 17:1177–1183.
- Tripathi, S., D. Zhang, and P. J. Paukstelis. 2015. An intercalation-locked parallel-stranded DNA tetraplex. *Nucleic Acids Res.* 43:1937–1944.
- Wang, Y., and D. J. Patel. 1994. Solution structure of the  $d(\text{T-C-G-A})$  duplex at acidic pH. A parallel-stranded helix containing C+, C, G,G and A,A pairs. *J. Mol. Biol.* 242:508–526.
- Robinson, H., J. H. van Boom, and A. H. Wang. 1994. 5'-CGA motif induces other sequences to form homo base-paired parallel-stranded DNA duplex: the structure of  $(\text{G-A})_n$  derived from four DNA oligomers containing  $(\text{G-A})_3$  sequence. *J. Am. Chem. Soc.* 116:1565–1566.
- Kettani, A., S. Bouaziz, ..., D. J. Patel. 1999. Interlocked mismatch-aligned arrowhead DNA motifs. *Structure*. 7:803–815.
- Rippe, K., V. Fritsch, ..., T. M. Jovin. 1992. Alternating  $d(\text{G-A})$  sequences form a parallel-stranded DNA homoduplex. *EMBO J.* 11:3777–3786.

36. Paukstelis, P. J., J. Nowakowski, ..., N. C. Seeman. 2004. Crystal structure of a continuous three-dimensional DNA lattice. *Chem. Biol.* 11:1119–1126.
37. Petersheim, M., and D. H. Turner. 1983. Base-stacking and base-pairing contributions to helix stability: thermodynamics of double-helix formation with CCGG, CCGGp, CCGGAp, ACCGGp, CCGGUp, and ACCGGUp. *Biochemistry.* 22:256–263.
38. Siegfried, N. A., and P. C. Bevilacqua. 2009. Thinking inside the box: designing, implementing, and interpreting thermodynamic cycles to dissect cooperativity in RNA and DNA folding. *Methods Enzymol.* 455:365–393.
39. Saoji, M., and P. J. Paukstelis. 2015. Sequence-dependent structural changes in a self-assembling DNA oligonucleotide. *Acta Crystallogr. D Biol. Crystallogr.* 71:2471–2478.
40. SantaLucia, J., Jr., R. Kierzek, and D. H. Turner. 1991. Functional group substitutions as probes of hydrogen bonding between GA mismatches in RNA internal loops. *J. Am. Chem. Soc.* 113:4313–4322.
41. Xia, T., J. SantaLucia, Jr., ..., D. H. Turner. 1998. Thermodynamic parameters for an expanded nearest-neighbor model for formation of RNA duplexes with Watson-Crick base pairs. *Biochemistry.* 37:14719–14735.
42. Allawi, H. T., and J. SantaLucia, Jr. 1997. Thermodynamics and NMR of internal G.T mismatches in DNA. *Biochemistry.* 36:10581–10594.

**Biophysical Journal, Volume 119**

**Supplemental Information**

**Stability of the pH-Dependent Parallel-Stranded d(CGA) Motif**

**Emily M. Luteran, Jason D. Kahn, and Paul J. Paukstelis**

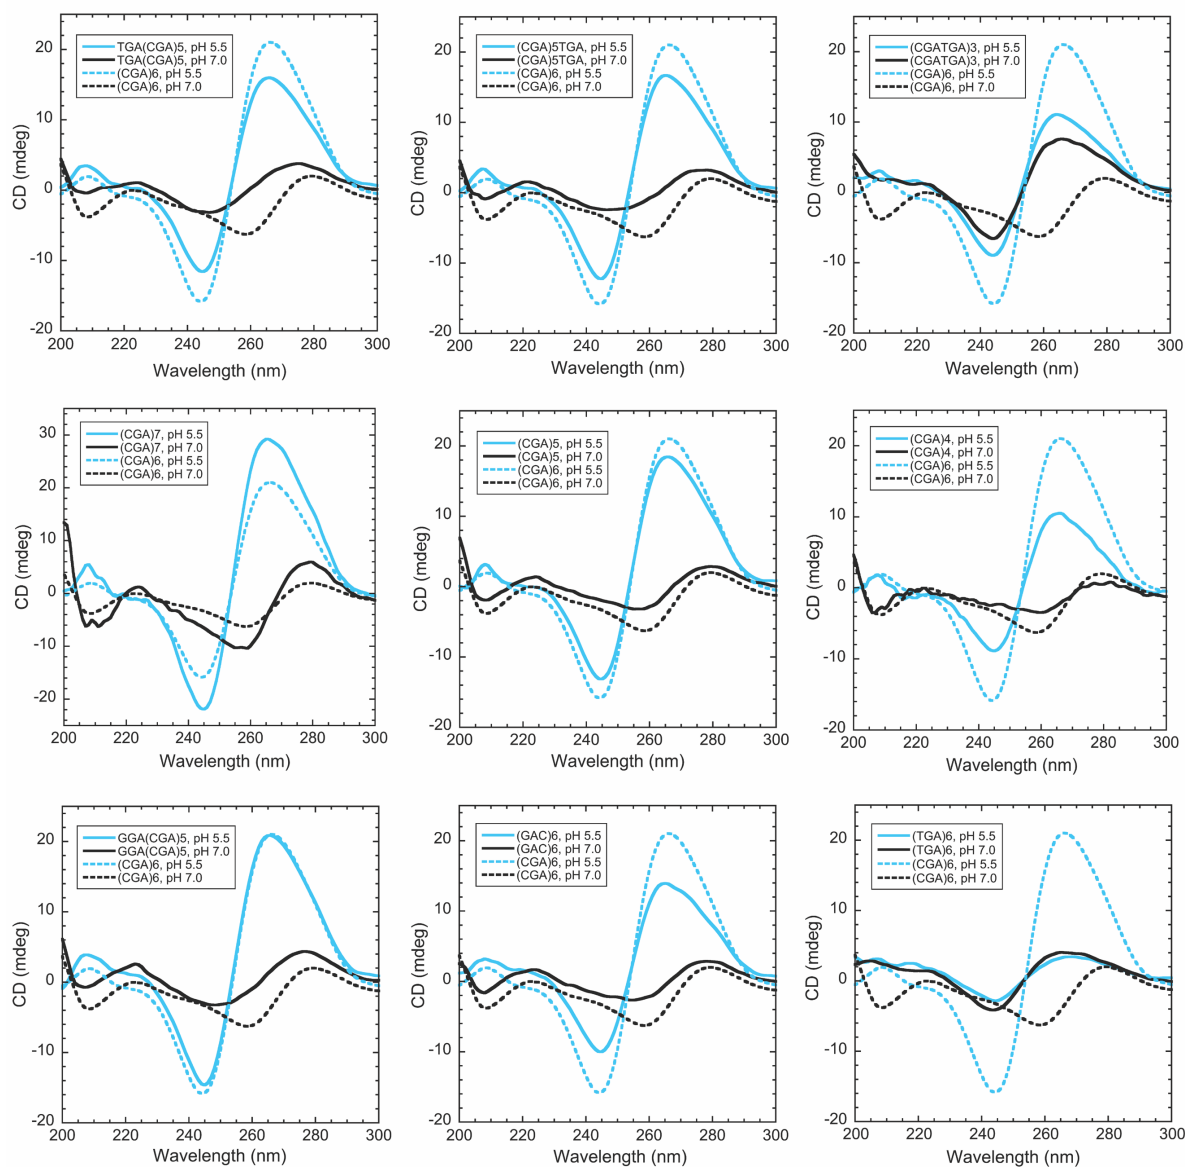

**Figure S1.** Circular dichroism spectra of 10  $\mu\text{M}$   $(\text{CGA})_6$  variants. The spectra of  $(\text{CGA})_6$  at pH 5.5 and pH 7.0 are shown (dashed lines) in each panel for reference. At pH 5.5 (blue curves), the prominent positive band at  $\sim 265$  nm and the negative band at  $\sim 245$  nm are characteristic of parallel-stranded duplex formation. As the number of d(CGAs) triplets decreases, the intensity of the bands associated with parallel-stranded duplexes also decreases. At pH 7.0 (black curves), the positive band at  $\sim 275$  nm and negative band at  $\sim 258$  nm are characteristic of anti-parallel strands.  $(\text{TGA})_6$  and  $(\text{CGATGA})_3$  have bands characteristic of anti-parallel strands at each pH, suggesting that pH sensitivity is decreased or eliminated with increasing d(TGA) content.



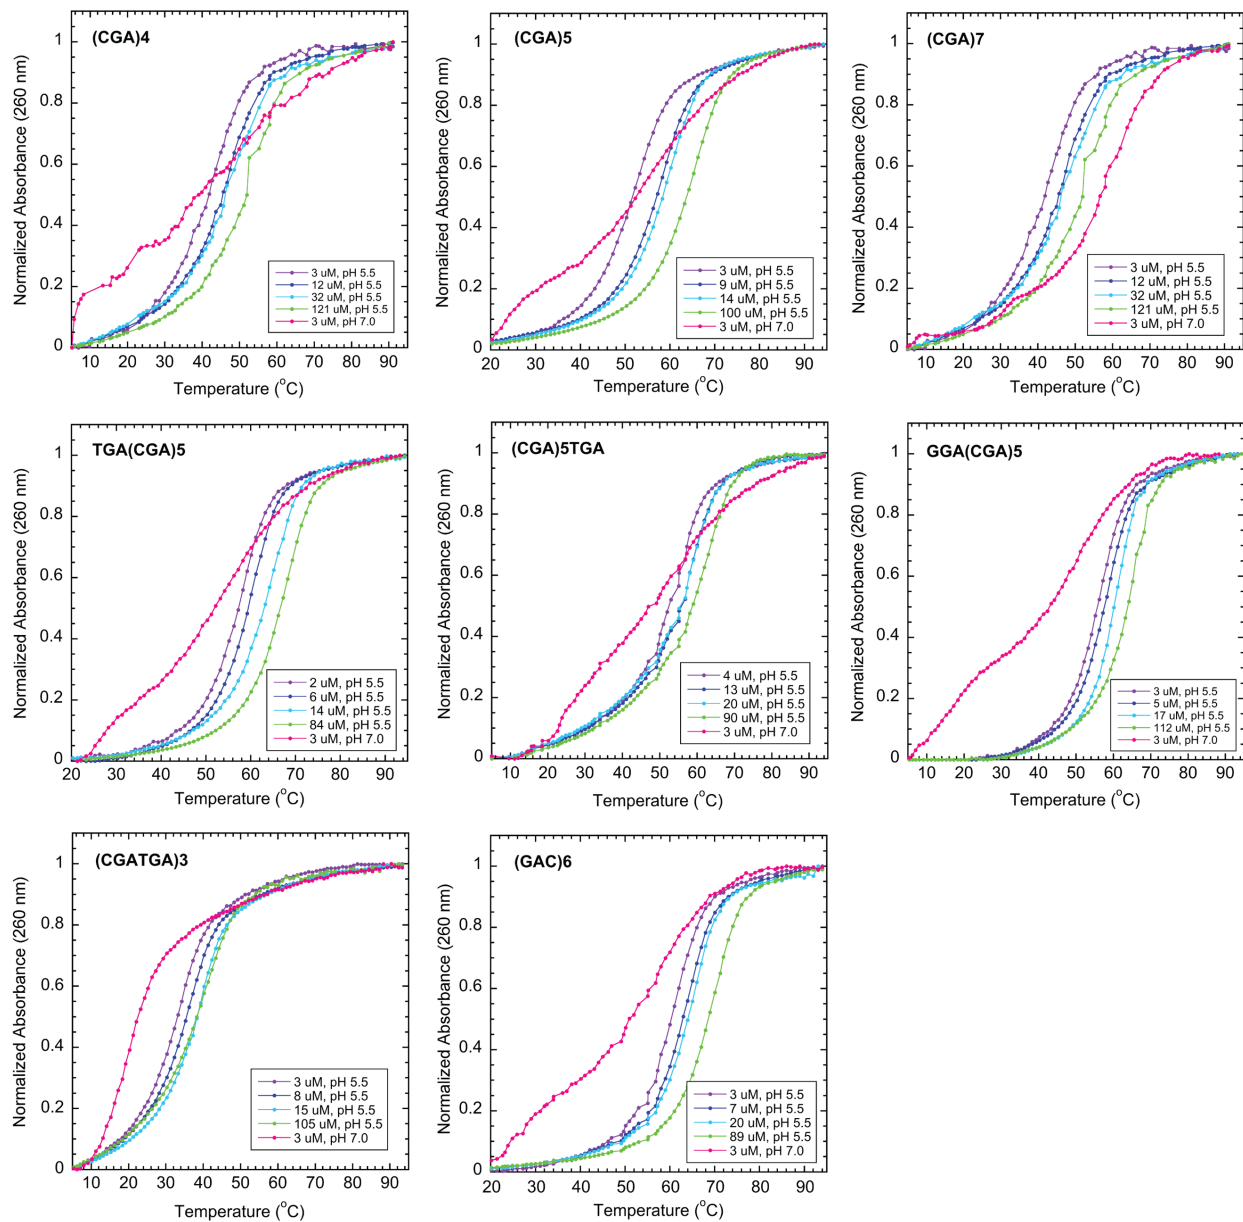

**Figure S2.** Normalized temperature versus absorbance curves for  $(CGA)_n$  variants at pH 5.5 (purple, blue, cyan, green) and pH 7.0 (pink). All  $(CGA)_n$  variants have concentration-dependent, two-state melting curves at pH 5.5, indicating bimolecular interactions. At pH 7.0, all variants exhibit non-two-state melting with apparent minor lower-temperature melting transitions between 20-40 °C.

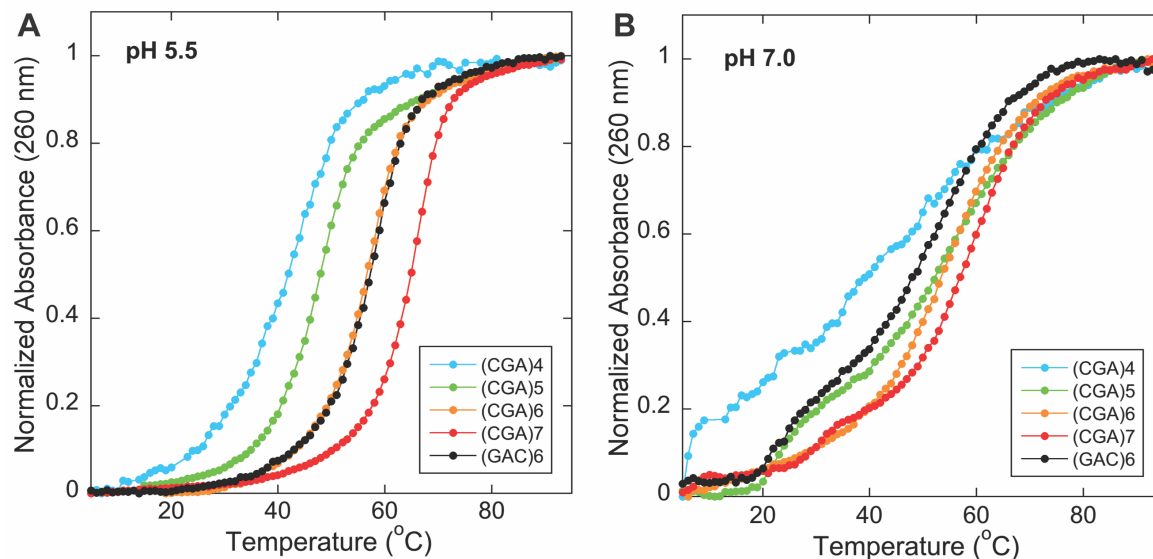

**Figure S3.** Normalized temperature versus absorbance curves for 2.5  $\mu\text{M}$   $(\text{CGA})_n$  variants, where  $n = 4$  to 7 at (A) pH 5.5 and (B) pH 7.0. It is unclear why  $(\text{GAC})_6$  behaves differently than  $(\text{CGA})_6$ , as it is a permutation of  $d(\text{CGA})$ , at pH 7.0. We suspect that the difference could arise from variations in hairpin loop and stem size, as well as the likelihood of interconversion between different hairpin forms. Assuming the  $d(\text{CGACG})$  loop is the most stable hairpin form,  $(\text{CGA})_6$  could form a 6-bp stem where the  $d(\text{CGACG})$  loop is capped by A-A producing the two-state transition seen at pH 7.0. The slight destabilization seen for  $(\text{GAC})_6$  could arise from a similar hairpin with a  $d(\text{CGACG})$  loop but only accommodating 5-bp. Further, the non-two state melt suggests that  $(\text{GAC})_6$  could be dynamically interconverting between two different forms – one with a 5-bp stem and a  $d(\text{CGACG})$  loop or 7-bp stem and a  $d(\text{ACGA})$  loop.

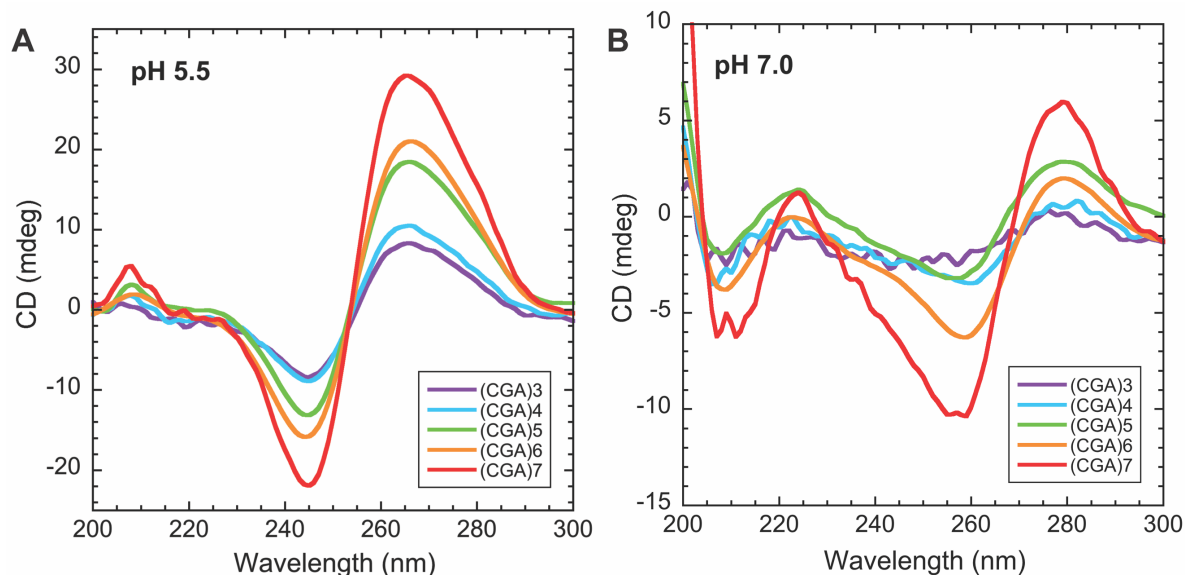

**Figure S4.** CD spectra of 10  $\mu\text{M}$  (CGA)<sub>n</sub> where  $n = 3$  to 7 at (A) pH 5.5 and (B) pH 7.0. At pH 5.5, the intensity of the bands characteristic of the parallel-stranded duplex (245 nm, 265 nm) decrease as the number of d(CG A) units decrease. This suggests that the parallel-stranded form can exist at all repeat sizes tested. At pH 7.0, the signal intensity corresponding to anti-parallel strands (258 nm, 275 nm) decreases with repeat number, but is lost when  $n \leq 4$  suggesting that the hairpin structure cannot form at low repeat number.

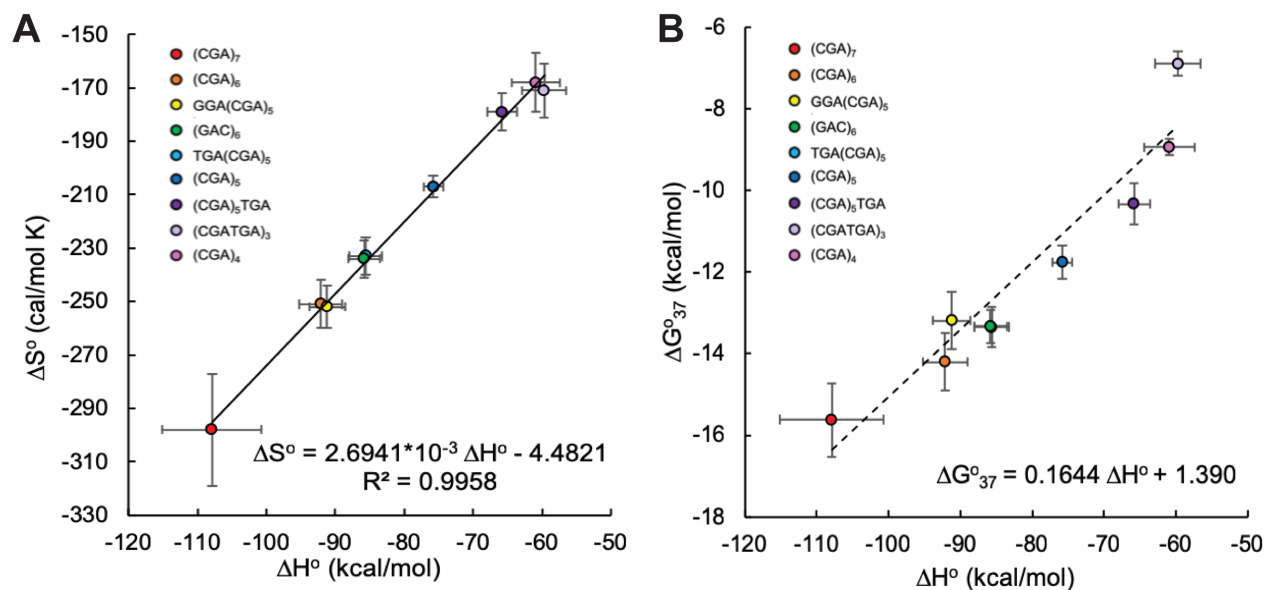

**Figure S5.** Apparent entropy-enthalpy compensation of all (CGA)<sub>n</sub> variants used in this study. **(A)** The positive correlation between  $\Delta H^\circ$  and  $\Delta S^\circ$  indicates a strong enthalpy-entropy compensation for all oligonucleotides tested. **(B)** The  $\Delta G^\circ_{37}$  vs  $\Delta H^\circ$  plot suggests that compensation is due to the underlying physical reality, as opposed to experimental error.



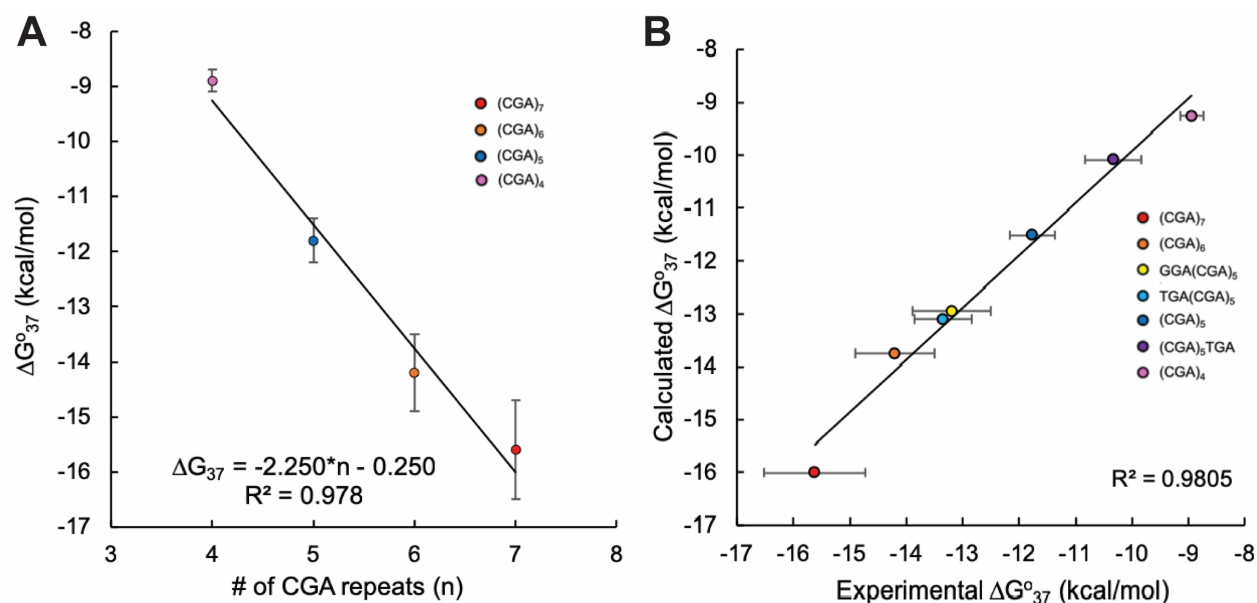

**Figure S6.** Thermodynamic estimates can be used to predict  $\Delta G_{37}^{\circ}$  values for new triplet repeat sequences. **(A)** Linear fit of  $(CGA)_n$  sequences vs experimentally obtained  $\Delta G_{37}^{\circ}$  values. **(B)** Experimental  $\Delta G_{37}^{\circ}$  is highly correlated to calculated  $\Delta G_{37}^{\circ}$  for all sequences, assuming additive contributions from each triplet. Estimates for d(CGA) were obtained from the fit in **A**, while estimates for 5'-d(GGA), 5'-d(TGA), 3'-d(TGA) were obtained from Table 1. All sequences were included except  $(TGA)_6$  and  $(CGATGA)_3$ .

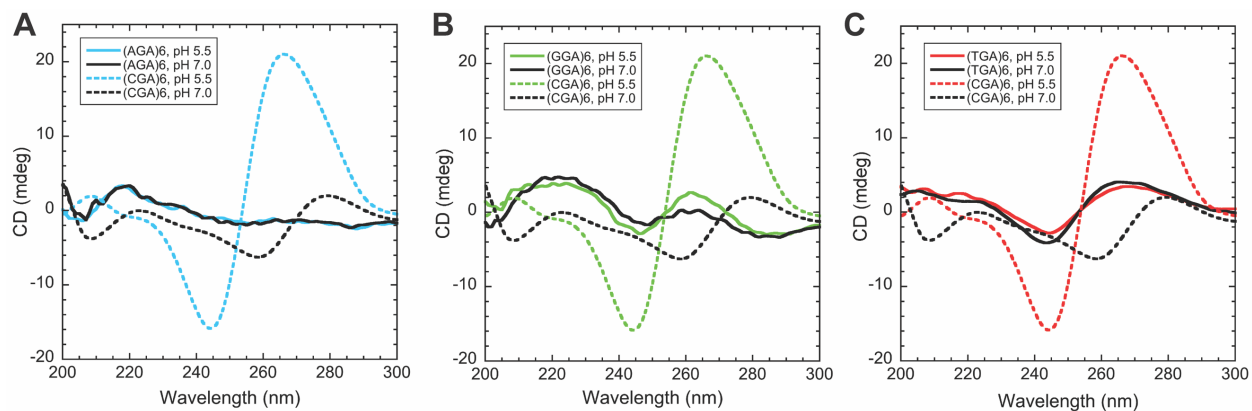

**Figure S7.** CD spectra of 10  $\mu\text{M}$  (NGA)<sub>6</sub> sequences compared to (CGA)<sub>6</sub>. **(A)** (AGA)<sub>6</sub> does not have CD bands characteristic of parallel- or anti-parallel oriented strands and is not pH dependent. The lack of CD signal could suggest a lack of structure at each pH. **(B)** (GGA)<sub>6</sub> also does not have CD bands characteristic of parallel- or anti-parallel oriented strands and is not pH dependent. The band at 220 nm could indicate the formation of a different structure at each pH. **(C)** (TGA)<sub>6</sub> has CD signal characteristic of the anti-parallel form at each pH, suggesting a lack of pH sensitivity.

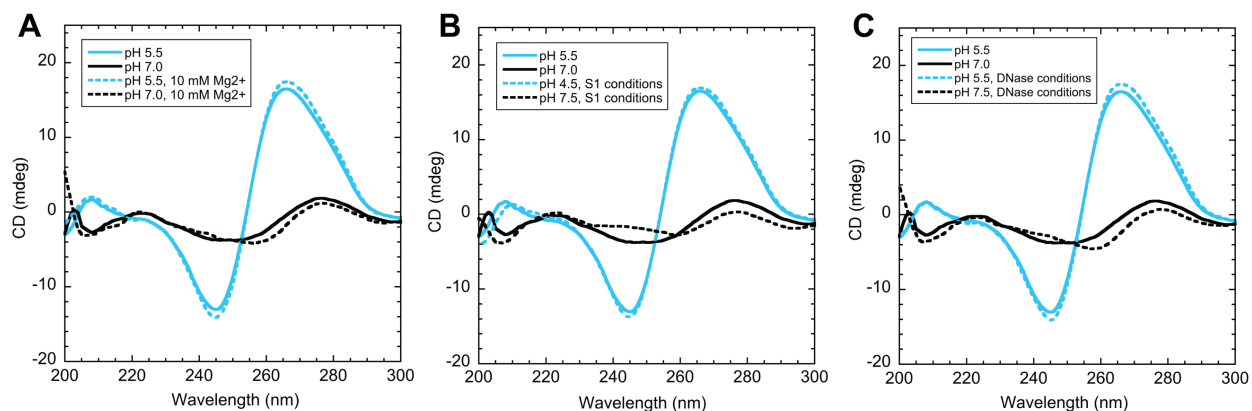

**Figure S8.** CD spectra of 10  $\mu\text{M}$  GGA(CG A)<sub>5</sub> with various divalent cations at pH 5.5 (blue) and pH 7.0 (black). Divalent cations ( $\text{Mg}^{2+}$ ,  $\text{Zn}^{2+}$ , and  $\text{Ca}^{2+}$ ) do not affect the parallel-stranded structure formed at pH 5.5 or anti-parallel structure formed at pH 7.0. (A) The addition of 10 mM magnesium chloride does not affect the structure of GGA(CG A)<sub>5</sub> at pH 5.5 or 7.0. (B) GGA(CG A)<sub>5</sub> retained parallel-stranded structure at pH 4.5 and anti-parallel structure at pH 7.5 in S1 nuclease reaction conditions containing 2 mM zinc sulfate and 300 mM sodium chloride. (C) GGA(CG A)<sub>5</sub> retained parallel-stranded structure at pH 5.5 and anti-parallel structure at pH 7.5 in DNase I nuclease reaction conditions containing 0.5 mM calcium chloride and 2.5 mM magnesium chloride.

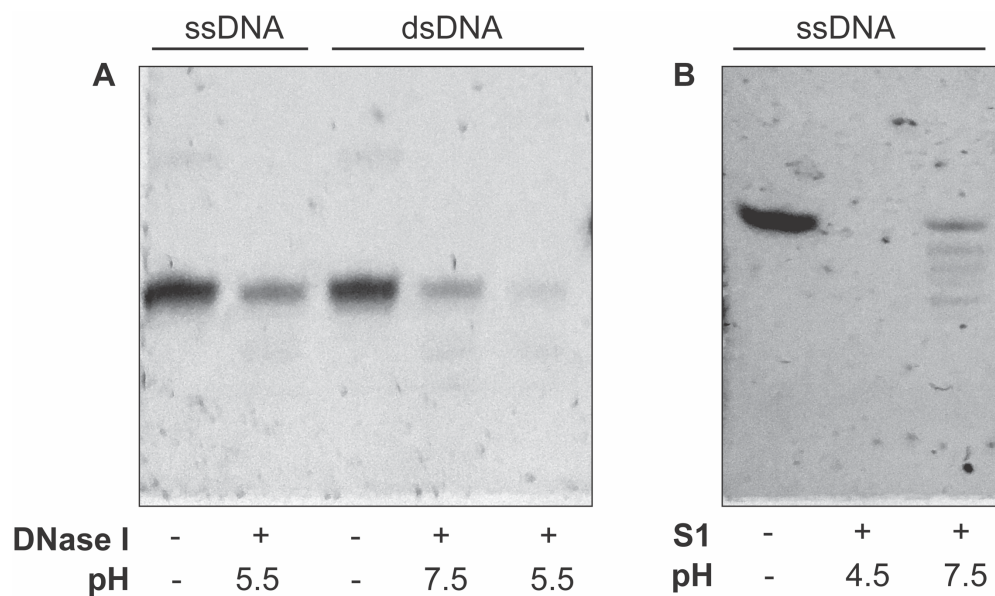

**Figure S9.** Control DNase I and S1 nuclease sensitivity experiments performed on d(GGACAGCTGGGAG) with  $Mg^{2+}$  to form double stranded (ds) DNA or without  $Mg^{2+}$  for single stranded (ss) DNA. **(A)** ssDNA and dsDNA exposed to DNase I at pH 5.5 and 7.5. DNase I functioned optimally on dsDNA at pH 5.5. Reduced activity was observed for ssDNA at pH 5.5 and dsDNA at pH 7.5. **(B)** Control ssDNA incubated with S1 nuclease at pH 4.5 and 7.5. S1 nuclease was more active at pH 4.5 than at pH 7.5.



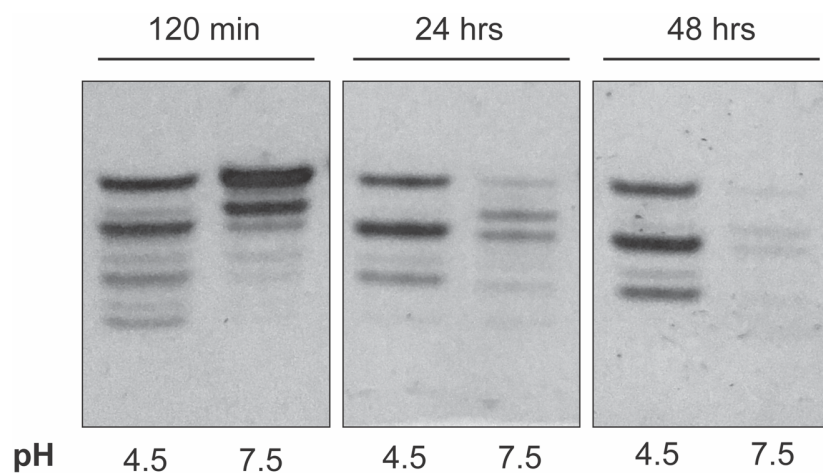

**Figure S10.** Extended S1 digestion of TGA(CGA)<sub>5</sub>. The bands are almost completely digested at pH 7.5 when TGA(CGA)<sub>5</sub> was exposed to S1 nuclease for 2 days, suggesting that the structure formed at this pH is dynamic or not resistant to S1 digestion over time. In contrast, the intensity of the 18, 15, and 12-nt bands corresponding to digestion by S1 nuclease at pH 4.5 does not change over two days of exposure. This suggests that the parallel-stranded duplex formed is stable and resistant to S1 degradation at room temperature.

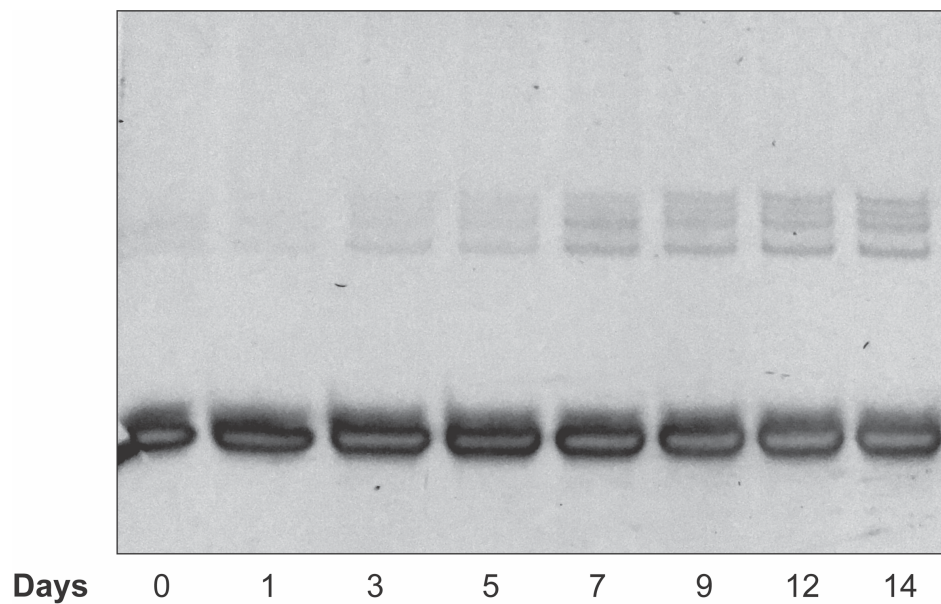

**Figure S11.** High molecular weight (HMW) bands formed over time when  $(CGA)_6$  is incubated in deionized water, at room temperature, for up to 2 weeks, as shown by denaturing PAGE. All variants, except  $(TGA)_6$ , contain HMW bands in 8 M urea denaturing gels (not shown). HMW band formation increases with time, lower pH, storage temperature and oligonucleotide concentration.
